# Supplementary material for: Clinical Relevance of +936 C>T VEGFA and c.233C>T bFGF Polymorphisms in Chronic Lymphocytic Leukemia
Source: MDPI journal article supplement (doi:10.3390/genes11060686), 2020-06-23
Supplement: s1 [file s1]

Supplementary Figure 1.

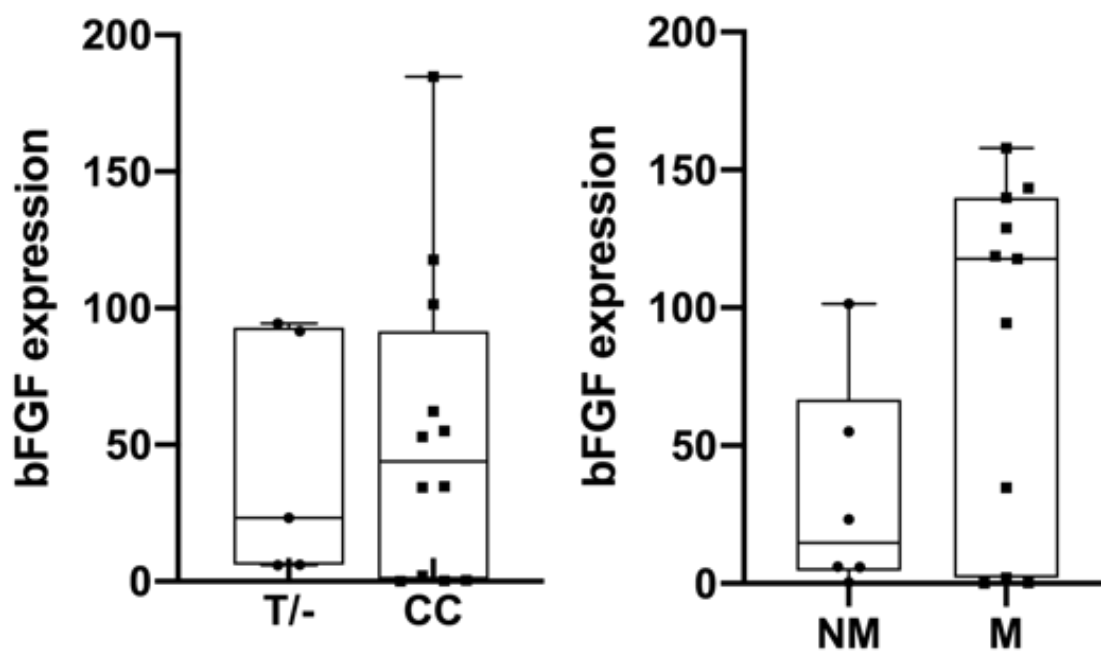

**Supplementary Figure 1. Expression of *bFGF* in B-CLL patients.** A) The *bFGF* expression was evaluated by Q-PCR in function of the rs1449683 *bFGF* genotype in 17 patients (T/- n=5, C/C n=12). B) The *bFGF* expression was evaluated in IgVH non-mutated patients (NM, n=6) and IgVH mutated patients (M, n=11).
